# Supplementary material for: AIP1 is a novel Agenet/Tudor domain protein from Arabidopsis that interacts with regulators of DNA replication, transcription and chromatin remodeling
Source: PubMed Central journal article supplement (PMC4634149; doi:10.1186/s12870-015-0641-z), 2015-11-04
Supplement: 12870_2015_641_MOESM2_ESM.pdf [file 12870_2015_641_MOESM2_ESM.pdf]

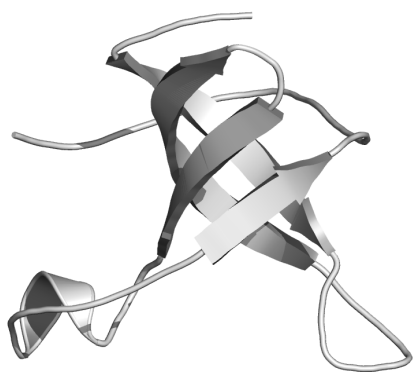

*Picea abies*  
MA\_20337g0010

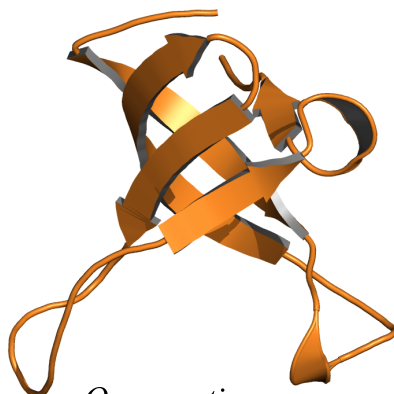

*Oryza sativa*  
Os05g04180

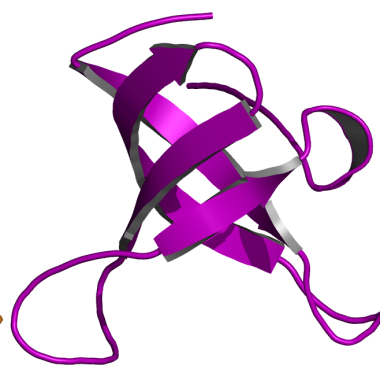

*Populus trichocarpa*  
Potri\_018G030500\_5

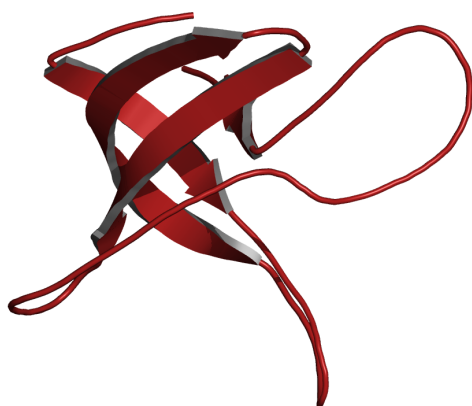

*Brassica rapa*  
Bra022578

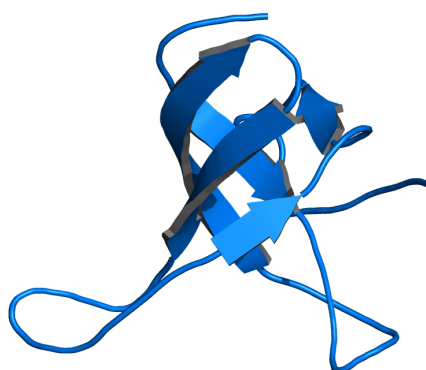

*Manihot esculenta*  
4\_1\_003152

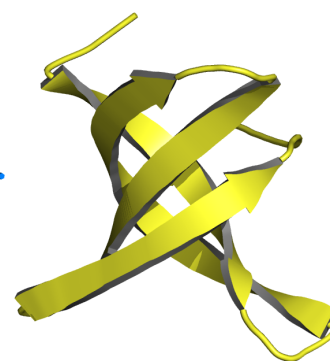

*Arabidopsis thaliana*  
AT5G13020

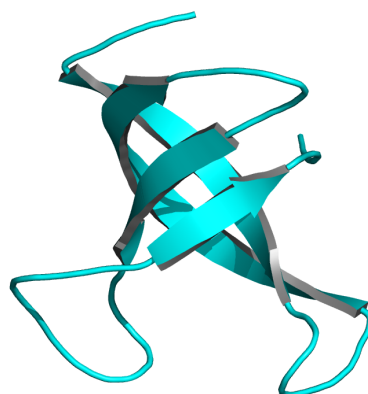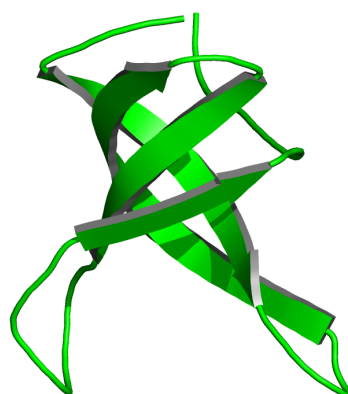

Agenet domain repetition 1    Agenet domain repetition 2

*Arabidopsis thaliana* AT3G62300

Additional File 2: Modeled structure of Agenet/Tudor domains from plant proteins. The images represent the Agenet/Tudor models generated in the I-TASSER server. The structures are colored in white (B\_MA\_20337g0010), purple (I\_ENT\_Potri\_018G030500\_5), firebrick (I\_Central\_Bra022578), orange (I\_Multiple\_Os05g04180), blue (I\_BAH\_cassava4\_1\_003152), cyan (D\_DUF\_AT3G62300.1), yellow (D\_DUF\_AT5G13020), and green (D\_DUF\_AT3G62300.2).
