# Supplementary material for: AIP1 is a novel Agenet/Tudor domain protein from Arabidopsis that interacts with regulators of DNA replication, transcription and chromatin remodeling
Source: PubMed Central journal article supplement (PMC4634149; doi:10.1186/s12870-015-0641-z), 2015-11-04
Supplement: 12870_2015_641_MOESM3_ESM.pdf [file 12870_2015_641_MOESM3_ESM.pdf]

## Class I

● AT4G32620 ● AT3G12140 ● AT5G06780 ● AT3G57970 ● AT1G02740

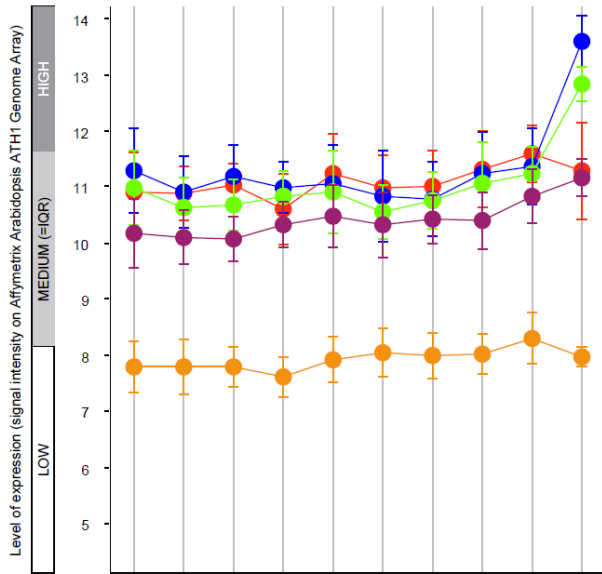

Stage of Development

## Class II

● AT5G23770 ● AT5G23780 ● AT1G26540 ● AT1G11420 ● AT2G47230  
● AT3G62300 ● AT5G23800 ● AT1G03300

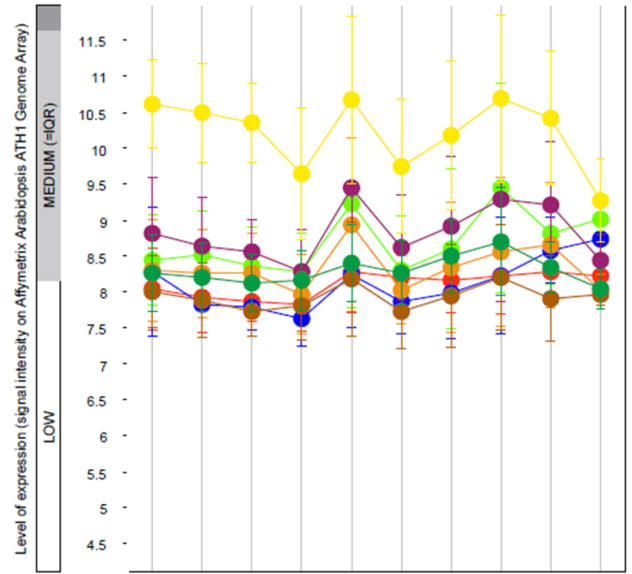

Stage of Development

## Class III

● AT5G20030 ● AT5G58610 ● AT4G17330 ● AT4G32440 ● AT3G06520  
● AT1G09320 ● AT1G06340 ● AT5G42670 ● AT5G52070 ● AT1G68580

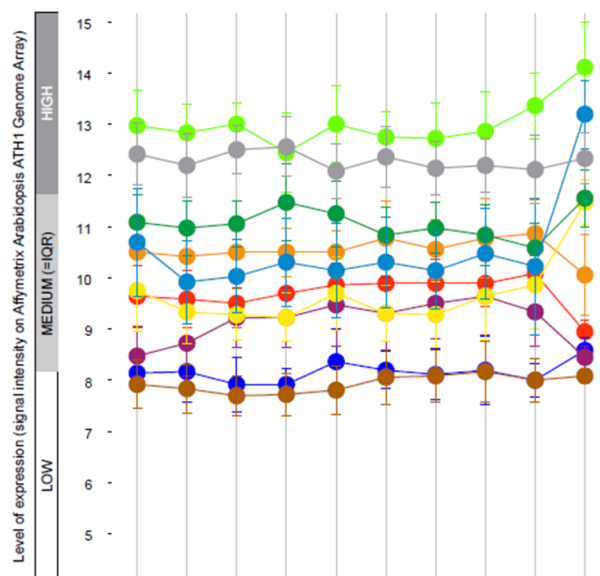

Stage of Development

Additional File 3: Temporal expression pattern of each gene from the four different classes of the Agenes/Tudor family. Graphic representation of the average values among the expression values published in many microarray experiments available in Genevestigator. Bars indicate mean  $\pm$  standard error of different microarray experiments. Each gene is represented in a different color, as specified in the legend. Genes AT5G07350 and AT3G27460 from Class IV are out of analysis since there are no probes in the available microarray data.
