# Supplementary material for: AIP1 is a novel Agenet/Tudor domain protein from Arabidopsis that interacts with regulators of DNA replication, transcription and chromatin remodeling
Source: PubMed Central journal article supplement (PMC4634149; doi:10.1186/s12870-015-0641-z), 2015-11-04
Supplement: 12870_2015_641_MOESM7_ESM.pdf [file 12870_2015_641_MOESM7_ESM.pdf]

**Additional File 7:** All members of Agenet/Tudor family in plants. Table reveals the locus from 31 genomes where a putative Agenet/Tudor domain were found. It also points out this Agenet/Tudor domain localization in the sequence, and other domain co-existing with it and it's localization as well. The possibles horthologs in Arabidopsis were mentioned, and AIP1 horthologs are highlighted in yellow.

#### Green Algae

##### *Ostreococcus lucimarinus*

| Locus                 | Agenet/Tudor Domain | Other Domain | Hortolog Ath |
|-----------------------|---------------------|--------------|--------------|
| No sequence was found |                     |              |              |

##### *Coccomyxa subellipsoidea*

| Locus            | Agenet/Tudor Domain | Other Domain | Hortolog Ath |
|------------------|---------------------|--------------|--------------|
| Genemark1.2852_g | Nterm               | No           | AT5G55600    |

##### *Volvox carteri*

| Locus                 | Agenet/Tudor Domain | Other Domain | Hortolog Ath |
|-----------------------|---------------------|--------------|--------------|
| No sequence was found |                     |              |              |

##### *Chlamydomonas reinhardtii*

| Locus                 | Agenet/Tudor Domain | Other Domain | Hortolog Ath |
|-----------------------|---------------------|--------------|--------------|
| No sequence was found |                     |              |              |

#### Bryophyta

##### *Physcomitrella patens*

| Locus        | Agenet/Tudor Domain | Other Domain | Hortolog Ath |
|--------------|---------------------|--------------|--------------|
| Pp1s94_117V6 | Cterm               | No           | AT4G17330    |
| Pp1s9_69V6   | Cterm               | No           | AT4G17330    |
| Pp1s33_333V6 | Cterm               | BAH Nterm    | AT5G55600    |
| Pp1s235_70V6 | Cterm               | BAH Nterm    | AT5G55600    |

#### Lycopodiophyta

##### *Selaginella moellendorffii*

| Locus  | Agenet/Tudor Domain | Other Domain | Hortolog Ath |
|--------|---------------------|--------------|--------------|
| 85351  | Nterm               | No           | AT1G06340    |
| 405024 | Nterm               | No           | AT5G42670    |
| 444321 | Central             | No           | AT4G17330    |
| 415212 | Cterm               | No           | AT4G17330    |
| 415282 | Cterm               | BAH Nterm    | AT5G55600    |

#### Gymnosperm

##### *Ginkgo biloba*

| Locus            | Agenet/Tudor Domain | Other Domain | Hortolog Ath |
|------------------|---------------------|--------------|--------------|
| PgdbGbiloba_1364 | Cterm               | no           | AT4G17330    |

*Gentum gnemon*

| <b>Locus</b>          | <b>Agenet/Tudor Domain</b> | <b>Other Domain</b> | <b>Hortolog Ath</b> |
|-----------------------|----------------------------|---------------------|---------------------|
| No sequence was found |                            |                     |                     |

*Picea abies*

| <b>Locus</b>   | <b>Agenet/Tudor Domain</b> | <b>Other Domain</b> | <b>Hortolog Ath</b> |
|----------------|----------------------------|---------------------|---------------------|
| MA_10134770    | Nterm                      | no                  | AT1G09320           |
| MA_10425924    | Nterm                      | ENT Cterm           | AT1G09320           |
| MA_10119976    | Nterm                      | no                  | AT1G09320           |
| MA_98820g0010  | Nterm                      | ENT Cterm           | AT4G32440           |
| MA_35064g0010  | Nterm                      | ENT Cterm           | AT5G20030           |
| MA_20337g0010  | Cterm                      | no                  | AT4G17330           |
| MA_491766g0010 | Nterm                      | no                  | AT1G06340           |

**Angiosperm Monocots***Brachypodium distachyon*

| <b>Locus</b> | <b>Agenet/Tudor Domain</b> | <b>Other Domain</b> | <b>Hortolog Ath</b> |
|--------------|----------------------------|---------------------|---------------------|
| Bradi4g16400 | Nterm                      | No                  | AT1G09320           |
| Bradi2g38497 | Nterm, Central, Cterm      | No                  | AT1G09320           |
| Bradi4g16390 | 2 x Nterm                  | DUF724 Cterm        | AT2G47230           |
| Bradi4g20140 | 2 x Nterm                  | DUF724 Cterm        | AT1G09320           |
| Bradi3g07670 | Nterm                      | ENT Cterm           | AT5G20030           |
| Bradi3g36500 | Cterm                      | BAH Nterm           | AT1G68580           |
| Bradi1g21820 | Cterm                      | BAH Nterm           | AT5G55600           |

*Oryza sativa*

| <b>Locus</b> | <b>Agenet/Tudor Domain</b> | <b>Other Domain</b> | <b>Hortolog Ath</b> |
|--------------|----------------------------|---------------------|---------------------|
| Os06g39900   | Nterm                      | ENT Cterm           | AT4G32440           |
| Os02g11000   | Nterm                      | PHD                 | AT3G14980           |
| Os11g35060   | 2 x Nterm                  | DUF724 Cterm        | AT3G62300           |
| Os01g37600   | 2 x Nterm                  | DUF724 Cterm        | AT2G47230           |
| Os05g04180   | Nterm, Central, Cterm      | No                  | AT1G09320           |
| Os10g41030   | Cterm                      | No                  | AT4G17330           |
| Os10g26430   | Cterm                      | BAH Nterm           | AT1G68580           |
| Os08g33420   | Cterm                      | BAH Nterm           | AT1G68580           |
| Os07g41640   | Cterm                      | BAH Nterm           | AT5G55600           |

*Panicum virgatum*

| <b>Locus</b>      | <b>Agenet/Tudor Domain</b> | <b>Other Domain</b> | <b>Hortolog Ath</b> |
|-------------------|----------------------------|---------------------|---------------------|
| Pavirv00030603m.g | Nterm                      | No                  | AT3G06520           |
| Pavirv00066077m.g | Nterm                      | PHD Cterm           | AT5G58610           |
| Pavirv00010013m.g | Nterm                      | ENT Cterm           | AT4G32440           |
| Pavirv00001885m.g | Nterm                      | ENT Cterm           | AT4G32440           |
| Pavirv00059050m.g | Nterm                      | DUF724 Cterm        | AT3G62300           |
| Pavirv00014438m.g | Nterm                      | DUF724 Cterm        | AT3G62300           |
| Pavirv00018559m.g | 2 x Nterm                  | DUF724 Cterm        | AT2G47230           |
| Pavirv00038455m.g | 2 x Nterm                  | DUF724 Cterm        | AT2G47230           |
| Pavirv00021402m.g | 2 x Nterm                  | DUF724 Cterm        | AT3G62300           |

|                   |                |           |           |
|-------------------|----------------|-----------|-----------|
| Pavirv00058515m.g | Nterm, Central | No        | AT1G09320 |
| Pavirv00001452m.g | Nterm, Central | No        | AT1G09320 |
| Pavirv00002776m.g | Central        | No        | AT4G17330 |
| Pavirv00048214m.g | Cterm          | BAH Cterm | AT5G55600 |
| Pavirv00057736m.g | Cterm          | BAH Cterm | AT1G68580 |
| Pavirv00030084m.g | Cterm          | BAH Cterm | AT1G68580 |
| Pavirv00029453m.g | Cterm          | BAH Cterm | AT5G55600 |

*Zea mays*

| Locus         | Agenet/Tudor Domain   | Other Domain           | Hortolog Ath |
|---------------|-----------------------|------------------------|--------------|
| GRMZM2G160149 | Nterm                 | ENT Cterm              | AT4G32440    |
| GRMZM2G048274 | 2 x Nterm             | DUF724 Cterm           | AT2G47220    |
| GRMZM2G024641 | Nterm, Cterm          | No                     | AT1G09320    |
| GRMZM2G033478 | Central, Cterm        | No                     | AT4G17330    |
| GRMZM2G155889 | Nterm, Central, Cterm | No                     | AT1G09320    |
| GRMZM2G340601 | Cterm                 | BAH Nterm              | AT1G68580    |
| GRMZM2G037444 | Cterm                 | BAH Nterm              | AT5G55600    |
| GRMZM2G419305 | Cterm                 | BAH Nterm              | AT5G55600    |
| GRMZM2G336718 | Cterm                 | Start Nterm            | AT1G68580    |
| GRMZM2G123644 | Cterm                 | Start and BAH Nterm    | AT1G68580    |
| GRMZM2G439819 | Cterm                 | BAH Nterm, Kinase, Rio | AT1G68580    |
| GRMZM2G392624 | Central               | No                     | AT1G68580    |
| GRMZM2G049155 | Cterm                 | ENT Nterm              | AT5G13020    |

*Sorghum bicolor*

| Locus       | Agenet/Tudor Domain | Other Domain | Hortolog Ath |
|-------------|---------------------|--------------|--------------|
| Sb05g021643 | Nterm               | No           | AT3G06520    |
| Sb05g021640 | Nterm               | DUF724 Cterm | AT2G47230    |
| Sb03g024845 | Nterm               | DUF724 Cterm | AT3G06520    |
| Sb02g006590 | Nterm               | DUF724 Cterm | AT2G47220    |
| Sb03g024845 | Nterm               | DUF724 Cterm | AT3G06520    |
| Sb10g029020 | Nterm               | DUF724 Cterm | AT3G62300    |
| Sb01g000510 | 2 x Nterm           | DUF724 Cterm | AT3G62300    |
| Sb07g021050 | Cterm               | BAH Nterm    | AT1G68580    |
| Sb02g038900 | Cterm               | BAH Nterm    | AT5G55600    |

**Angiosperm Eudicot**

*Aquilegia coerulea*

| Locus           | Agenet/Tudor Domain | Other Domain | Hortolog Ath |
|-----------------|---------------------|--------------|--------------|
| AquCa_014_00214 | Nterm               | No           | AT1G06340    |
| AquCa_021_00238 | Nterm               | No           | AT1G06340    |
| AquCa_001_00767 | Nterm               | No           | AT5G20030    |
| AquCa_014_00436 | Nterm               | No           | AT3G06520    |
| AquCa_045_00126 | Nterm               | No           | AT5G58610    |
| AquCa_034_00419 | Nterm               | No           | AT5G42670    |
| AquCa_003_00462 | Nterm               | WRC Cterm    | AT1G09320    |
| AquCa_017_00564 | Nterm               | ENT Cterm    | AT4G32440    |
| AquCa_049_00123 | Nterm               | ENT Cterm    | AT4G32440    |

|                 |              |                          |           |
|-----------------|--------------|--------------------------|-----------|
| AquCa_020_00171 | Nterm        | ENT Cterm                | AT5G20030 |
| AquCa_004_00391 | Nterm        | PHD Cterm                | AT5G58610 |
| AquCa_014_00439 | Nterm        | UDP-glucosyl transferase | AT3G02100 |
| AquCa_017_00734 | Nterm        | DUF724                   | AT3G62300 |
| AquCa_003_00455 | Nterm        | DUF724                   | AT1G11420 |
| AquCa_014_00437 | Nterm        | DUF724                   | AT3G62300 |
| AquCa_030_00351 | Nterm        | DUF724                   | AT3G62300 |
| AquCa_030_00350 | Nterm        | UF724 Cterm, WRC Nterm   | AT3G62300 |
| AquCa_030_00352 | Nterm        | UF724 Cterm, WRC Nterm   | AT3G62300 |
| AquCa_014_00295 | 2x Nterm     | DUF724                   | AT3G62300 |
| AquCa_003_00461 | 2x Nterm     | DUF724                   | AT3G62300 |
| AquCa_003_00458 | 2x Cterm     | UF640 Nterm, WRC Cterm   | AT5G58500 |
| AquCa_014_00295 | 2 x Nterm    | No                       | AT3G62300 |
| AquCa_003_00463 | Nterm, Cterm | No                       | AT1G09320 |
| AquCa_013_00777 | Cterm        | No                       | AT4G17330 |
| AquCa_002_01142 | Cterm        | BAH Cterm                | AT1G68580 |
| AquCa_018_00032 | Cterm        | BAH Cterm                | AT5G55600 |
| AquCa_110_00042 | Cterm        | BAH Cterm                | AT5G55600 |

### Angiosperm Eudicots Asterid

#### *Mimulus guttatus*

| Locus           | Agenet/Tudor Domain   | Other Domain | Hortolog Ath |
|-----------------|-----------------------|--------------|--------------|
| mgv1a020423m.g  | Nterm                 | PHD Cterm    | AT5G58610    |
| mgv1a018116m.g  | Nterm                 | No           | AT1G06340    |
| mgv1a026197m.g  | Nterm                 | No           | AT2G25590    |
| mgv1a022506m.g  | Nterm                 | No           | AT1G09320    |
| mgv1a018116m.g  | Nterm                 | No           | AT1G06340    |
| mgv1a009346m.g  | Nterm, Cterm          | No           | AT1G09320    |
| mgv1a005230m.g  | Nterm, Central, Cterm | No           | AT1G09320    |
| mgv1a005486m.g  | Nterm, Central, Cterm | No           | AT3G06520    |
| mgv1a001520m.g  | 2x Nterm              | DUF724       | AT3G62300    |
| mgv1a000584m.g  | Central               | No           | AT4G17330    |
| mgv1a022930m.g  | Central               | No           | AT5G55600    |
| mgv1a018111m.g  | Central               | No           | AT5G55600    |
| mgv1a022090m.g  | Central               | No           | AT5G55600    |
| mgv1a024218m.g  | Central               | No           | AT5G55600    |
| mgv1a021732m.g  | Central               | No           | AT5G55600    |
| mgv1a022260m.g  | Central               | No           | AT5G55600    |
| mgv1a026054m.g  | Central               | No           | AT5G55600    |
| mgv1a002875m.g  | Cterm                 | BAH Nterm    | AT5G55600    |
| mgv1a003408m.g  | Cterm                 | BAH Nterm    | AT1G68580    |
| mgv1a021302m.g  | Cterm                 | BAH Nterm    | AT1G68580    |
| mgv11b018945m.g | Cterm                 | No           | AT5G55600    |

#### *Solanum tuberosum*

| Locus                | Agenet/Tudor Domain | Other Domain | Hortolog Ath |
|----------------------|---------------------|--------------|--------------|
| PGSC0003DMG402020444 | Nterm               | No           | AT1G06340    |
| PGSC0003DMG400027055 | Nterm               | No           | AT1G06340    |
| PGSC0003DMG400044084 | Nterm               | No           | AT1G09320    |

|                      |                    |           |           |
|----------------------|--------------------|-----------|-----------|
| PGSC0003DMG400027056 | Nterm              | No        | AT1G06340 |
| PGSC0003DMG400027076 | Nterm              | No        | AT1G06340 |
| PGSC0003DMG400026947 | Nterm              | No        | AT1G06340 |
| PGSC0003DMG400020062 | Nterm              | No        | AT1G06340 |
| PGSC0003DMG400041590 | Central            | No        | AT1G06340 |
| PGSC0003DMG400003974 | Central            | No        | AT5G55600 |
| PGSC0003DMG400035825 | Central            | No        | AT1G06340 |
| PGSC0003DMG400027076 | Nterm              | No        | AT1G06340 |
| PGSC0003DMG400022079 | Nterm              | PHD Cterm | AT5G58610 |
| PGSC0003DMG400019480 | Nterm              | ENT Cterm | AT4G32440 |
| PGSC0003DMG400002584 | Nterm              | DUF724    | AT1G11420 |
| PGSC0003DMG400009053 | 2x Nterm           | DUF724    | AT2G47230 |
| PGSC0003DMG400015969 | 2x Nterm, 2x Cterm | No        | AT3G06520 |
| PGSC0003DMG400002758 | Nterm, Cterm       | No        | AT3G06520 |
| PGSC0003DMG400027057 | Nterm, Cterm       | No        | AT1G09320 |
| PGSC0003DMG400022180 | Cterm              | BAH Nterm | AT5G55600 |

### Angiosperm Eudicot

#### *Vitis vinifera*

| Locus             | Agenet/Tudor Domain | Other Domain | Hortolog Ath |
|-------------------|---------------------|--------------|--------------|
| GSVIVT01015486001 | Nterm               | No           | AT5G20030    |
| GSVIVT01011913001 | Nterm               | No           | AT1G68580    |
| GSVIVT01035806001 | Nterm               | ENT Cterm    | AT4G32440    |
| GSVIVT01028157001 | 2 x Nterm           | DUF724 Cterm | AT2G47230    |
| GSVIVG01031264001 | Central, Cterm      | No           | AT1G09320    |
| GSVIVT01004716001 | Central, Cterm      | No           | AT4G17330    |
| GSVIVT01003480001 | Cterm               | BAH Nterm    | AT5G55600    |
| GSVIVT01014643001 | Cterm               | BAH Nterm    | AT5G55600    |
| GSVIVT01024715001 | Nterm               | PHD          | AT5G58610    |

### Angiosperm Eudicot Rosid Malvidae

#### *Eucalyptus grandis*

| Locus        | Agenet/Tudor Domain | Other Domain | Hortolog Ath |
|--------------|---------------------|--------------|--------------|
| EuCgr.I00172 | Nterm               | No           | AT5G58610    |
| EuCgr.B01689 | Nterm               | No           | AT1G09320    |
| EuCgr.J01526 | Nterm               | No           | AT1G06340    |
| EuCgr.H00912 | Nterm               | DUF724 Cterm | AT2G47230    |
| EuCgr.C04172 | Nterm               | ENT Cterm    | AT4G32440    |
| EuCgr.C01115 | Nterm               | ENT Cterm    | AT4G32440    |
| EuCgr.J01892 | Nterm               | PHD Cterm    | AT5G58610    |
| EuCgr.L00253 | Nterm, Cterm        | No           | AT1G09320    |
| EuCgr.H04076 | Nterm, Cterm        | No           | AT1G09320    |
| EuCgr.E01742 | Nterm, Cterm        | No           | AT1G09320    |
| EuCgr.D01444 | Cterm               | BAH Nterm    | AT5G55600    |
| EuCgr.F03695 | Cterm               | BAH Nterm    | AT5G55600    |
| EuCgr.B03027 | Cterm               | BAH Nterm    | AT1G68580    |
| EuCgr.D02089 | Cterm               | No           | AT5G55600    |

*Citrus sinensis*

| <b>Locus</b>        | <b>Agenet/Tudor Domain</b> | <b>Other Domain</b> | <b>Hortolog Ath</b> |
|---------------------|----------------------------|---------------------|---------------------|
| oraNge1.1g038506m.g | Nterm                      | No                  | AT1G06340           |
| oraNge1.1g047914m.g | Nterm                      | No                  | AT1G06340           |
| oraNge1.1g046641m.g | Nterm                      | No                  | AT4G32440           |
| oraNge1.1g000791m.g | Nterm                      | PHD Cterm           | AT5G58610           |
| oraNge1.1g004709m.g | Cterm                      | BAH Nterm           | AT1G68580           |
| oraNge1.1g008969m.g | Cterm                      | BAH Nterm           | AT1G68580           |
| oraNge1.1g044464m.g | Cterm                      | BAH Nterm           | AT5G55600           |
| oraNge1.1g014914m.g | Nterm                      | ENT Cterm           | AT5G20030           |
| oraNge1.1g012860m.g | Nterm                      | ENT Cterm           | AT5G20030           |
| oraNge1.1g014912m.g | Nterm                      | ENT Cterm           | AT5G20030           |
| oraNge1.1g012860m.g | Nterm                      | ENT Cterm           | AT5G20030           |
| oraNge1.1g016251m.g | Nterm                      | ENT Cterm           | AT4G32440           |
| oraNge1.1g019582m.g | Nterm, Cterm               | No                  | AT1G09320           |
| oraNge1.1g019553m.g | Nterm, Cterm               | No                  | AT1G09320           |
| oraNge1.1g002548m.g | 2x Nterm                   | DUF724 Cterm        | AT3G62300           |
| oraNge1.1g000115m.g | Cterm                      | No                  | AT4G17330           |
| oraNge1.1g004709m.g | Cterm                      | BAH Nterm           | AT1G68580           |
| oraNge1.1g044464m.g | Cterm                      | BAH Nterm           | AT5G55600           |
| oraNge1.1g006118m.g | Cterm                      | BAH Nterm           | AT5G55600           |

*Theobroma cacao*

| <b>Locus</b>   | <b>Agenet/Tudor Domain</b> | <b>Other Domain</b> | <b>Hortolog Ath</b> |
|----------------|----------------------------|---------------------|---------------------|
| TheCC1EG021952 | Nterm                      | No                  | AT1G06340           |
| TheCC1EG029700 | Nterm                      | No                  | AT1G06340           |
| TheCC1EG028359 | Nterm                      | No                  | AT2G25590           |
| TheCC1EG001536 | Nterm                      | No                  | AT5G58610           |
| TheCC1EG020809 | Nterm                      | No                  | AT5G42670           |
| TheCC1EG038002 | Nterm                      | ENT Cterm           | AT5G20030           |
| TheCC1EG041594 | Nterm                      | PHD Cterm           | AT5G58610           |
| TheCC1EG019808 | Nterm                      | DUF724 Cterm        | AT2G47230           |
| TheCC1EG004869 | 2x Nterm                   | DUF724 Cterm        | AT2G47230           |
| TheCC1EG015949 | Cterm                      | No                  | AT4G17330           |
| TheCC1EG030410 | Cterm                      | BAH Nterm           | AT5G55600           |
| TheCC1EG011826 | Cterm                      | BAH Nterm           | AT1G68580           |
| TheCC1EG030669 | Cterm                      | BAH Nterm           | AT5G55600           |
| TheCC1EG026790 | Nterm, Cterm               | No                  | AT1G09320           |
| TheCC1EG021425 | Nterm, Central, Cterm      | No                  | AT3G06520           |

*Carica papaya*

| <b>Locus</b>              | <b>Agenet/Tudor Domain</b> | <b>Other Domain</b> | <b>Hortolog Ath</b> |
|---------------------------|----------------------------|---------------------|---------------------|
| evm.TU.superCoNtig_18.95  | Nterm                      | No                  | AT1G11420           |
| evm.TU.CoNtig_31482       | Nterm                      | No                  | AT3G62300           |
| evm.TU.superCoNtig_52.171 | Nterm                      | No                  | AT1G06340           |
| evm.TU.superCoNtig_52.173 | Nterm                      | No                  | AT1G06340           |
| evm.TU.superCoNtig_693    | Nterm                      | No                  | AT1G06340           |
| evm.TU.CoNtig_45528       | Nterm                      | No                  | AT1G06340           |
| evm.TU.CoNtig_34571       | Nterm                      | No                  | AT1G09320           |

|                           |              |           |           |
|---------------------------|--------------|-----------|-----------|
| evm.TU.superCoNtig_551    | Nterm        | No        | AT1G06340 |
| evm.TU.superCoNtig_75.67  | Nterm        | No        | AT5G20030 |
| evm.TU.superCoNtig_52.170 | Nterm        | No        | AT1G06340 |
| evm.TU.superCoNtig_693    | Nterm        | No        | AT1G06340 |
| evm.TU.superCoNtig_29.172 | Cterm        | No        | AT4G17330 |
| evm.TU.superCoNtig_551    | Nterm        | No        | AT1G06340 |
| evm.TU.CoNtig_43820       | Nterm        | No        | AT1G06340 |
| evm.TU.superCoNtig_427    | Nterm        | ENT Cterm | AT4G32440 |
| evm.TU.superCoNtig_48.181 | Nterm, Cterm | No        | AT1G09320 |
| evm.TU.superCoNtig_75.67  | Nterm        | No        | AT5G20030 |
| evm.TU.superCoNtig_52.172 | Central      | No        | AT1G06340 |

*Brassica rapa*

| <b>Locus</b> | <b>Agenet/Tudor Domain</b> | <b>Other Domain</b>                 | <b>Hortolog Ath</b> |
|--------------|----------------------------|-------------------------------------|---------------------|
| Bra022578    | Nterm                      | No                                  | AT5G42670           |
| Bra029141    | Nterm                      | No                                  | AT5G42670           |
| Bra032427    | Nterm                      | No                                  | AT1G06340           |
| Bra038440    | Nterm                      | No                                  | AT2G47230           |
| Bra003495    | Nterm                      | Phosphorylation Nterm, DUF724 Cterm | AT3G62300           |
| Bra020080    | Nterm                      | ENT Cterm                           | AT5G20030           |
| Bra011348    | Nterm                      | T Central, PPR repeat Cterm         | AT2G25580           |
| Bra040078    | Nterm                      | ENT Cterm                           | AT4G32440           |
| Bra004469    | Nterm                      | DUF724 Cterm                        | AT2G47230           |
| Bra036420    | Nterm                      | DUF724 Cterm                        | AT1G11420           |
| Bra004468    | Nterm                      | DUF724 Cterm                        | AT2G47230           |
| Bra040222    | Nterm                      | DUF724 Cterm                        | AT2G47230           |
| Bra020753    | 2x Nterm                   | DUF724 Cterm                        | AT2G47230           |
| Bra040223    | 2x Nterm                   | DUF724 Cterm                        | AT2G47230           |
| Bra003496    | 2x Nterm                   | DUF724 Cterm                        | AT3G62300           |
| Bra014402    | 2x Nterm                   | DUF724 Cterm                        | AT3G62300           |
| Bra033167    | 2x Nterm                   | DUF724 Cterm                        | AT3G62300           |
| Bra007670    | 2x Nterm                   | DUF724 Cterm                        | AT3G62300           |
| Bra038871    | 2x Nterm                   | DUF724 Cterm                        | AT1G11420           |
| Bra017883    | Nterm, Central             | No                                  | AT1G11420           |
| Bra031661    | Nterm, Central, Cterm      | No                                  | AT1G09320           |
| Bra018567    | Nterm, Central, Cterm      | No                                  | AT1G09320           |
| Bra028969    | Cterm                      | BAH Nterm                           | AT5G55600           |
| Bra002890    | Cterm                      | BAH Nterm                           | AT5G55600           |
| Bra004029    | Cterm                      | BAH Nterm                           | AT1G68580           |
| Bra004322    | Cterm                      | BAH Nterm                           | AT1G68580           |

*Capsella rubella*

| <b>Locus</b>      | <b>Agenet/Tudor Domain</b> | <b>Other Domain</b> | <b>Hortolog Ath</b> |
|-------------------|----------------------------|---------------------|---------------------|
| Carubv10002476m.g | Nterm                      | ENT Cterm           | AT5G20030           |
| Carubv10025786m.g | Nterm                      | PHD Cterm           | AT5G58610           |
| Carubv10023445m.g | Nterm                      | ENT Cterm           | AT4G32440           |
| Carubv10006237m.g | Nterm                      | ENT Cterm           | AT4G32440           |
| Carubv10011095m.g | Nterm                      | No                  | AT1G06340           |
| Carubv10000478m.g | Nterm                      | DUF724 Cterm        | AT5G23770           |

|                   |                          |              |           |
|-------------------|--------------------------|--------------|-----------|
| Carubv10016739m.g | 2x Nterm                 | DUF724 Cterm | AT3G62300 |
| Carubv10012522m.g | 2x Nterm                 | DUF724 Cterm | AT1G03300 |
| Carubv10010977m.g | 2x Nterm                 | DUF724 Cterm | AT1G26540 |
| Carubv10000562m.g | 2x Nterm                 | DUF724 Cterm | AT5G23800 |
| Carubv10000545m.g | 2x Nterm                 | DUF724 Cterm | AT5G23800 |
| Carubv10022757m.g | 2x Nterm                 | DUF724 Cterm | AT2G47230 |
| Carubv10013669m.g | 2x Nterm, Central, Cterm | No           | AT3G06520 |
| Carubv10008882m.g | Nterm, Central, Cterm    | No           | AT1G09320 |
| Carubv10003965m.g | Cterm                    | No           | AT4G17330 |
| Carubv10020075m.g | Cterm                    | BAH Nterm    | AT1G68580 |
| Carubv10020073m.g | Cterm                    | BAH Nterm    | AT1G68580 |
| Carubv10019941m.g | Cterm                    | BAH Nterm    | AT1G68580 |
| Carubv10026036m.g | Cterm                    | BAH Nterm    | AT5G55600 |

### Angiosperm Eudicot Rosid Fabidae

#### *Fragaria vesca*

| Locus                   | Agenet/Tudor Domain | Other Domain         | Hortolog Ath |
|-------------------------|---------------------|----------------------|--------------|
| geNe00235.1-v1.0-hybrid | Nterm               | No                   | AT1G09320    |
| geNe05025.1-v1.0-hybrid | Nterm, Cterm        | No                   | AT3G06520    |
| geNe18196.1-v1.0-hybrid | Nterm               | No                   | AT1G06340    |
| geNe20316.1-v1.0-hybrid | Nterm               | No                   | AT1G06340    |
| geNe22310.1-v1.0-hybrid | Nterm               | No                   | AT1G06340    |
| geNe20318.1-v1.0-hybrid | Nterm               | No                   | AT1G06340    |
| geNe30975.1-v1.0-hybrid | Nterm               | ENT Cterm            | AT4G32440    |
| geNe20274.1-v1.0-hybrid | Nterm               | ENT Cterm            | AT5G20030    |
| geNe11691.1-v1.0-hybrid | Nterm               | ENT Cterm            | AT4G32440    |
| geNe07936.1-v1.0-hybrid | Nterm               | PHD Cterm            | AT5G58610    |
| geNe20576.1-v1.0-hybrid | Nterm, Cterm        | DUF724 Cterm         | AT2G47230    |
| geNe21408.1-v1.0-hybrid | Nterm, Cterm        | DUF724 Cterm         | AT3G62300    |
| geNe21409.1-v1.0-hybrid | Nterm               | DUF724 Cterm         | AT3G62300    |
| geNe12406.1-v1.0-hybrid | Nterm, Cterm        | No                   | AT1G09320    |
| geNe19813.1-v1.0-hybrid | Cterm               | BAH Nterm            | AT5G55600    |
| geNe03763.1-v1.0-hybrid | Cterm               | BAH Nterm            | AT1G68580    |
| geNe23526.1-v1.0-hybrid | Cterm               | WLM Cterm, BAH Nterm | AT5G55600    |
| geNe08916.1-v1.0-hybrid | Cterm               | No                   | AT4G17330    |
| geNe12404.1-v1.0-hybrid | Cterm               | 7x PPR repeat        | AT5G42310    |
| geNe23370.1-v1.0-hybrid | Nterm               | No                   | AT1G09320    |

#### *Malus domestica*

| Locus         | Agenet/Tudor Domain | Other Domain | Hortolog Ath |
|---------------|---------------------|--------------|--------------|
| MDP0000122350 | Nterm               | No           | AT1G09320    |
| MDP0000278262 | Nterm               | No           | AT1G09320    |
| MDP0000320348 | Nterm               | No           | AT1G09320    |
| MDP0000148323 | Nterm               | No           | AT1G09320    |
| MDP0000169032 | Nterm               | No           | AT1G06340    |
| MDP0000169202 | Nterm               | No           | AT1G06340    |
| MDP0000273144 | Nterm               | No           | AT1G56320    |
| MDP0000688188 | Nterm               | No           | AT1G06340    |



|               |              |                           |           |
|---------------|--------------|---------------------------|-----------|
| MDP0000235367 | Nterm        | No                        | AT1G68580 |
| MDP0000274363 | Nterm        | No                        | AT1G26540 |
| MDP0000138467 | Nterm, Cterm | No                        | AT1G09320 |
| MDP0000203214 | 2x Nterm     | No                        | AT1G26540 |
| MDP0000138467 | Nterm, Cterm | No                        | AT1G09320 |
| MDP0000322413 | Nterm, Cterm | No                        | AT1G09320 |
| MDP0000242277 | Nterm        | se, Response regulator C  | AT2G47430 |
| MDP0000281445 | Nterm        | F-box Nterm, DNaJ Cterm   | AT5G49580 |
| MDP0000126098 | Nterm        | ENT Cterm                 | AT5G20030 |
| MDP0000250177 | Nterm        | PPR repeat, DUF260 Cte    | AT3G10572 |
| MDP0000183528 | Nterm        | DUF724 Cterm              | AT2G47230 |
| MDP0000193434 | Nterm        | DUF724 Cterm              | AT2G47230 |
| MDP0000212039 | Nterm        | DUF724 Cterm              | AT3G62300 |
| MDP0000122929 | 2x Nterm     | DUF724 Cterm              | AT2G47230 |
| MDP0000139988 | 2x Nterm     | DUF724 Cterm              | AT2G47230 |
| MDP0000244230 | Central      | RMT5 Cterm, ENT Cterr     | AT1G04870 |
| MDP0000304352 | Central      | ling lectin Nterm, ENT Ct | AT4G32440 |
| MDP0000143447 | Cterm        | BAH Nterm                 | AT1G68580 |
| MDP0000245750 | Cterm        | BAH Nterm                 | AT1G68580 |
| MDP0000163443 | Cterm        | BAH Nterm                 | AT5G55600 |
| MDP0000604089 | Cterm        | BAH Nterm                 | AT1G68580 |
| MDP0000282378 | Cterm        | BAH Nterm                 | AT5G55600 |
| MDP0000231374 | Cterm        | BAH Nterm                 | AT5G55600 |
| MDP0000312564 | Cterm        | BAH Nterm                 | AT5G55600 |
| MDP0000319854 | Cterm        | BAH Nterm                 | AT5G55600 |
| MDP0000245314 | Cterm        | BAH Nterm                 | AT5G55600 |
| MDP0000262281 | Cterm        | No                        | AT4G17330 |

*Glycine max*

| Locus         | Agenet/Tudor Domain | Other Domain | Hortolog Ath |
|---------------|---------------------|--------------|--------------|
| Glyma05g04731 | Cterm               | No           | AT4G17330    |
| Glyma12g00251 | Nterm               | No           | AT5G42670    |
| Glyma06g43070 | Nterm               | No           | AT1G06340    |
| Glyma12g15170 | Nterm               | No           | AT1G06340    |
| Glyma06g07391 | Nterm               | No           | AT4G32440    |
| Glyma05g08291 | Nterm               | No           | AT5G20030    |
| Glyma09g26255 | Nterm               | No           | AT1G09320    |
| Glyma04g07330 | Nterm               | ENT Cterm    | AT4G32440    |
| Glyma17g12693 | Nterm               | ENT Cterm    | AT5G20030    |
| Glyma02g07171 | Nterm               | F-box Nterm  | AT1G09320    |
| Glyma16g29630 | Nterm               | F-box Nterm  | AT4G10400    |
| Glyma02g39300 | Nterm               | PHD Cterm    | AT5G58610    |
| Glyma11g27622 | Nterm               | PHD Cterm    | AT5G58610    |
| Glyma11g27510 | Nterm               | PHD Cterm    | AT5G58610    |
| Glyma10g28671 | Central             | No           | AT1G09320    |
| Glyma09g03740 | Nterm, Cterm        | No           | AT1G09320    |
| Glyma20g22810 | Nterm, Cterm        | No           | AT1G09320    |
| Glyma01g41721 | Cterm               | No           | AT4G17330    |
| Glyma11g03650 | Cterm               | No           | AT4G17330    |

|                |       |           |           |
|----------------|-------|-----------|-----------|
| Glyma002s00420 | Cterm | BAH Nterm | AT1G68580 |
| Glyma01g20775  | Cterm | BAH Nterm | AT1G68580 |
| Glyma18g08850  | Cterm | BAH Nterm | AT5G55600 |
| Glyma08g43990  | Cterm | BAH Nterm | AT5G55600 |
| Glyma15g12410  | Cterm | BAH Nterm | AT5G55600 |
| Glyma09g01511  | Cterm | BAH Nterm | AT5G55600 |

*Medicago truncatula*

| <b>Locus</b>  | <b>Agenet/Tudor Domain</b> | <b>Other Domain</b> | <b>Hortolog Ath</b> |
|---------------|----------------------------|---------------------|---------------------|
| Medtr2g033390 | Nterm, Central             | No                  | AT3G06520           |
| Medtr4g079830 | Nterm                      | No                  | AT1G06340           |
| Medtr5g089140 | Nterm                      | No                  | AT1G06340           |
| Medtr5g089220 | Nterm                      | No                  | AT1G06340           |
| Medtr5g089250 | Nterm                      | No                  | AT1G06340           |
| Medtr4g079980 | Nterm                      | No                  | AT1G06340           |
| Medtr3g065560 | Nterm                      | No                  | AT1G06340           |
| Medtr4g027030 | Nterm                      | No                  | AT5G58610           |
| Medtr1g019680 | Nterm                      | No                  | AT1G06340           |
| Medtr4g127390 | Nterm                      | No                  | AT1G06340           |
| AC233684_4    | Nterm                      | No                  | AT1G09320           |
| Medtr4g024780 | Nterm                      | F-box Nterm         | AT3G58980           |
| Medtr4g023710 | Nterm                      | F-box Nterm         | AT1G09320           |
| Medtr7g017280 | Nterm                      | F-box Nterm         | AT3G58980           |
| Medtr4g026550 | Nterm                      | F-box Nterm         | AT1G09320           |
| Medtr4g113670 | Nterm                      | ENT Cterm           | AT5G20030           |
| Medtr3g107680 | Nterm                      | DUF724 Cterm        | AT4G32440           |
| Medtr5g071340 | Nterm                      | PDH                 | AT5G58610           |
| Medtr4g024810 | Nterm                      | NB-ARC Cterm        | AT1G09320           |
| Medtr2g026390 | Cterm                      | BAH Nterm           | AT5G55600           |
| Medtr1g084560 | Central                    | No                  | AT1G09320           |
| Medtr5g012780 | Cterm                      | No                  | AT4G17330           |
| Medtr4g100800 | Cterm                      | No                  | AT4G17330           |
| Medtr5g055210 | Cterm                      | BAH Nterm           | AT1G68580           |

*Populus trichocarpa*

| <b>Locus</b>     | <b>Agenet/Tudor Domain</b> | <b>Other Domain</b> | <b>Hortolog Ath</b> |
|------------------|----------------------------|---------------------|---------------------|
| Potri.001G364300 | Cterm                      | BAH Nterm           | AT5G55600           |
| Potri.009G151200 | Nterm                      | No                  | AT1G06340           |
| Potri.008G119400 | Nterm                      | No                  | AT1G68580           |
| Potri.001G163500 | Nterm                      | No                  | AT3G62300           |
| Potri.004G193200 | Nterm                      | No                  | AT1G06340           |
| Potri.002G118600 | Nterm                      | PDH                 | AT5G58610           |
| Potri.005G216200 | Nterm                      | PDH                 | AT5G20030           |
| Potri.009G072600 | Nterm                      | PDH                 | AT5G58610           |
| Potri.006G250600 | Nterm                      | ENT Cterm           | AT4G32440           |
| Potri.018G030500 | Nterm                      | ENT Cterm           | AT4G32440           |
| Potri.002G046800 | Nterm                      | ENT Cterm           | AT4G32440           |
| Potri.002G192300 | 2 x Nterm                  | DUF724 Cterm        | AT2G47230           |
| Potri.014G117800 | 2 x Nterm                  | DUF724 Cterm        | AT2G47230           |

|                  |                |           |           |
|------------------|----------------|-----------|-----------|
| Potri.005G011100 | Nterm, Cterm   | No        | AT1G09320 |
| Potri.013G006900 | Nterm, Cterm   | No        | AT1G09320 |
| Potri.010G149300 | Nterm, Central | No        | AT3G06520 |
| Potri.006G017400 | Cterm          | BAH Nterm | AT5G55600 |
| Potri.010G126700 | Cterm          | BAH Nterm | AT1G68580 |
| Potri.001G365800 | Cterm          | BAH Nterm | AT5G55600 |
| Potri.016G007500 | Cterm          | BAH Nterm | AT5G55600 |
| Potri.001G157300 | Cterm          | No        | AT4G17330 |
| Potri.003G077600 | Cterm          | No        | AT4G17330 |

*Ricinus communis*

| <b>Locus</b>  | <b>Agenet/Tudor Domain</b> | <b>Other Domain</b> | <b>Hortolog Ath</b> |
|---------------|----------------------------|---------------------|---------------------|
| 29900.t000084 | Nterm                      | No                  | AT1G06340           |
| 57892.t000001 | Nterm                      | No                  | AT1G09320           |
| 57944.t000001 | Nterm                      | No                  | AT1G09320           |
| 30128.t000003 | Nterm                      | No                  | AT2G47230           |
| 29900.t000085 | Nterm                      | No                  | AT1G06340           |
| 29883.t000033 | Nterm                      | ENT Cterm           | AT4G32440           |
| 29841.t000059 | Nterm                      | ENT Cterm           | AT4G32440           |
| 30208.t000006 | 2 x Nterm                  | DUF724 Cterm        | AT2G47230           |
| 30128.t000393 | Nterm, Cterm               | No                  | AT1G09320           |
| 29889.t000112 | Nterm, Central, Cterm      | No                  | AT3G06520           |
| 30101.t000002 | Cterm                      | No                  | AT4G17330           |
| 29629.t000008 | Cterm                      | BAH Nterm           | AT5G55600           |
| 28883.t000009 | Cterm                      | BAH Nterm           | AT1G68580           |
| 30076.t000178 | Nterm                      | AT-hook Cterm       | AT3G62300           |

*Manihot esculenta*

| <b>Locus</b>       | <b>Agenet/Tudor Domain</b> | <b>Other Domain</b> | <b>Hortolog Ath</b> |
|--------------------|----------------------------|---------------------|---------------------|
| Cassava4.1_010435m | Nterm, Cterm               | No                  | AT3G06520           |
| Cassava4.1_024563m | Nterm, Cterm               | No                  | AT3G06520           |
| Cassava4.1_003739m | 2 x Nterm                  | No                  | AT3G06520           |
| Cassava4.1_003561m | 2 x Nterm                  | No                  | AT1G11420           |
| Cassava4.1_004413m | Nterm                      | No                  | AT2G47230           |
| Cassava4.1_021242m | Nterm                      | No                  | AT1G06340           |
| Cassava4.1_009683m | Nterm                      | ENT Cterm           | AT4G32440           |
| Cassava4.1_003152m | Cterm                      | BAH Nterm           | AT5G55600           |
| Cassava4.1_002945m | Cterm                      | BAH Nterm           | AT5G55600           |
| Cassava4.1_011107m | Nterm                      | No                  | AT2G25590           |
| Cassava4.1_029040m | Nterm                      | PDH                 | AT5G20030           |
| Cassava4.1_002893m | Cterm                      | BAH Nterm           | AT1G68580           |
| Cassava4.1_032472m | Nterm                      | ENT Cterm           | AT5G20030           |
| Cassava4.1_000049m | Cterm                      | No                  | AT4G17330           |
| Cassava4.1_000055m | Cterm                      | No                  | AT4G17330           |
| Cassava4.1_010435m | Nterm, Cterm               | No                  | AT1G09320           |
| Cassava4.1_010763m | Nterm                      | No                  | AT5G42670           |

*Arabidopsis thaliana*

| <b>Locus</b> | <b>Agenet/Tudor Domain</b> | <b>Other Domain</b> |
|--------------|----------------------------|---------------------|
|--------------|----------------------------|---------------------|

|                |                    |                      |
|----------------|--------------------|----------------------|
| AT5G42670      | Nterm              | No                   |
| AT5G52070      | Nterm              | No                   |
| AT4G32440      | Nterm              | No                   |
| AT1G06340      | Nterm              | No                   |
| AT1G09320      | Nterm, Cterm       | No                   |
| AT3G06520      | Nterm 2x, Cterm 2x | No                   |
| AT5G20030      | Nterm              | ENT Cterm            |
| AT5G58610      | Nterm              | PHDCterm             |
| AT5G23770DUF8  | Nterm              | DUF724 Cterm         |
| AT5G23780DUF9  | Nterm              | DUF724 Cterm         |
| AT1G03300DUF1  | Nterm 2x           | DUF724 Cterm         |
| AT1G26540DUF3  | Nterm 2x           | DUF724 Cterm         |
| AT1G11420DUF2  | Nterm 2x           | DUF724 Cterm         |
| AT2G47230DUF6  | Nterm 2x           | DUF724 Cterm         |
| AT3G62300DUF7  | Nterm 2x           | DUF724 Cterm         |
| AT5G23800DUF10 | Nterm 2x           | DUF724 Cterm         |
| AT3G12140      | Cterm              | ENT Nterm            |
| AT3G57970      | Cterm              | ENT Nterm            |
| AT5G06780      | Cterm              | ENT Nterm            |
| AT2G25590      | Cterm              | BAH Nterm            |
| AT5G55600      | Cterm              | BAH Nterm            |
| AT1G68580      | Cterm              | BAH Nterm            |
| AT4G17330      | Cterm              | No                   |
| AT5G40550      | Tudor Cterm        | No                   |
| AT3G27460      | Tudor Cterm        | No                   |
| AT2G02570      | Tudor Central      | No                   |
| AT4G32620      | Tudor Nterm        | No                   |
| AT1G02740      | Tudor Nterm        | MRG Cterm            |
| AT5G61780      | Tudor Cterm        | Snase 5x N and Cterm |
| AT5G07350      | Tudor Cterm        | Snase 4x N and Cterm |

---
