# Supplementary material for: AIP1 is a novel Agenet/Tudor domain protein from Arabidopsis that interacts with regulators of DNA replication, transcription and chromatin remodeling
Source: PubMed Central journal article supplement (PMC4634149; doi:10.1186/s12870-015-0641-z), 2015-11-04
Supplement: 12870_2015_641_MOESM9_ESM.pdf [file 12870_2015_641_MOESM9_ESM.pdf]

**Additional File 9:** Parameters data from Structural Modeling in I-TASSER. Scoring function (C-score) is based on the relative clustering structural density and the consensus significance score of multiple threading templates to estimate the accuracy of the I-TASSER predictions. Numbers can vary from -5 to 2 and higher numbers are more significant. TM-score is a measure of the absolute distance between atoms of the final model in comparison with the native structure. Ideal TM-Score is higher than 0,5.

| <b>Gene</b>        | <b>C--score</b> | <b>TM--score</b> |
|--------------------|-----------------|------------------|
| MA_20337g0010      | -1.20           | 0.56±0.15        |
| Potri_018G030500_5 | -0.51           | 0.65±0.13        |
| Bra022578          | -1.08           | 0.58±0.14        |
| Os05g04180         | -0.46           | 0.65±0.13        |
| cassava4_1_003152  | -1.71           | 0.51±0.15        |
| AT3G62300.1        | -1.18           | 0.57±0.15        |
| AT5G13020          | 0.02            | 0.72±0.11        |
| AT3G62300.2        | -0.82           | 0.61±0.14        |
