# Supplementary material for: AIP1 is a novel Agenet/Tudor domain protein from Arabidopsis that interacts with regulators of DNA replication, transcription and chromatin remodeling
Source: PubMed Central journal article supplement (PMC4634149; doi:10.1186/s12870-015-0641-z), 2015-11-04
Supplement: 12870_2015_641_MOESM10_ESM.pdf [file 12870_2015_641_MOESM10_ESM.pdf]

**Additional File 10:** List of proteins tested in yeast two hybrid screen using C-terminal portion of AIP1 containing the DUF724 domain as bait. 2HD, for yeast two hybrid. P, for positive interactions and N, for negative.

| <b>Gene</b> | <b>Function</b>                   | <b>2HD</b> |
|-------------|-----------------------------------|------------|
| ABAP1       | Cell cycle control                | P          |
| ARM         | N-Term portion of ABAP1           | P          |
| BTB         | C-Term portion of ABAP1           | N          |
| ARIA        | Interacts with ABAP1              | P          |
| TCP24       | Interacts with ABAP1              | N          |
| ORC1a       | Pre-RC member                     | N          |
| ORC2        | Pre-RC member                     | N          |
| ORC4        | Pre-RC member                     | N          |
| ORC5        | Pre-RC member                     | N          |
| ORC6        | Pre-RC member                     | N          |
| CDT1a       | Pre-RC member                     | N          |
| CDT1b       | Pre-RC member                     | N          |
| CDC6        | Pre-RC member                     | N          |
| MCM2        | Pre-RC member                     | N          |
| MCM3        | Pre-RC member                     | N          |
| MCM7        | Pre-RC member                     | N          |
| HBO1        | Histone Acetylase                 | N          |
| HDAC1       | Histone Acetylase                 | N          |
| HDAC2       | Histone Acetylase                 | N          |
| DRB4        | Histone Acetylase                 | N          |
| LHP1        | Interacts with methylated histone | P          |
| H4          | Histone 4                         | N          |
| SNF2/RAD54  | Helicase-Like                     | N          |
| PP2a        | Phosphatase                       | N          |
| DBB         | DNA Repair                        | N          |
