# Supplementary material for: AIP1 is a novel Agenet/Tudor domain protein from Arabidopsis that interacts with regulators of DNA replication, transcription and chromatin remodeling
Source: PubMed Central journal article supplement (PMC4634149; doi:10.1186/s12870-015-0641-z), 2015-11-04
Supplement: 12870_2015_641_MOESM12_ESM.pdf [file 12870_2015_641_MOESM12_ESM.pdf]

**Additional File 12: Primers used for PCR cloning and qRT-PCR amplification.**

| <b>Primer name</b>   | <b>Sequence(5'-3')</b>                                 |
|----------------------|--------------------------------------------------------|
| AIP1attb1F           | GGGGACAAGTTTGTACAAAAAAGCAGGCTGAAAGCATGTTGTTAACTACGGGAA |
| AIP1attb2R           | GGGGACCACTTTGTACAAGAAAGCTGGGTCTTATTCCATGGGGCAGC        |
| ABAP1attb1F          | ATGATAATCTCAAAAATCGTTCA                                |
| ABAP1attb2R          | TTATACGACGGTTGGGGG                                     |
| ARIAattb1            | ATGGACCAACAACCGGAG                                     |
| ARIAattb2            | CAACCTCAAGCTTTGCAGGT                                   |
| LHP1attb1            | ATGAAAGGGGCAAGTGGTG                                    |
| LHP1attb2            | AGGCGTTCGATTGTACTTGAG                                  |
| qRT-PCR AIP1 F       | AGCTCGGATGCAGTCTCAAGCAG                                |
| qRT-PCR AIP1 R       | TGGGGCAGCGAGAATTGCCTG                                  |
| qRT-PCR UBI14 F      | TCACTGGAAAGACCATTACTCTTGAA                             |
| qRT-PCR UBI14 R      | AGCTGTTTTCCAGCGAAGATG                                  |
| qRT PCR UBI10 F      | CACACTCCACTTGGTCTTGCGCT                                |
| qRT PCR UBI10 R      | TGGTCTTTCCGGTGAGGAGTCTTCA                              |
| qRT PCR GAPDH F      | TTGGTGACAACAGGTCAAGCA                                  |
| qRT PCR GAPDH R      | AAACTTGTCGCTCAATGCAATC                                 |
| qRT PCR CyclinB1;1 F | CCTCCATTCCTCTCAACAG                                    |
| qRT PCR CyclinB1;1 R | CCTGGCAGCTGTGGAATATG                                   |
| qRT PCR CDKB2;1 F    | TGTTCTTGCCAGTGGCTACGG                                  |
| qRT PCR CDKB2;1 R    | CACGTGGTCAGGTTAATGGA                                   |
| qRT PCR CDT1b F      | AAATGTCTGACTGCCGAAACAG                                 |
| qRT PCR CDT1b R      | AAGTGAAATGTCATGTGAAGTTGCTT                             |
| qRT PCR PCNA2 F      | ATCTGGCGCCTAAGATTGAA                                   |
| qRT PCR PCNA2 R      | CAACAAAGGACTCGAACGAA                                   |
| qRT PCR FT F         | CCAAGTCCTAGCAACCCTCA                                   |
| qRT PCR FT R         | TACACTGTTTGCCTGCCAAG                                   |
| qRT PCR AG F         | CAAACTCCAACAGGCAATTG                                   |
| qRT PCR AG R         | CATTTTCAGCTATCTTTGCAC                                  |
| qRT PCR AP3 F        | GCCCTAACACCACAACGAAGG                                  |
| qRT PCR AP3 R        | CTCACCTAGCCTCTGCTTGATC                                 |
